# Supplementary material
Source: publisher site journal article supplement (https://www.dovepress.com/article/298563)
Supplement: Supplementary file 1 [file get_supplementary_file.php]

**Atorvastatin**  
**10, 20, 40, 80 milligrams**  
**Oral tablets**

**1. What this medicine is**

**1.1 What generic name of this medicine is**

- Generic name of this medicine is atorvastatin, a lipid-lowering medicine

**1.2 what it is used for**

- It is used with diet control for
  - Reducing blood lipid
  - Prevention of cardiovascular and cerebrovascular disease in high-risk patients

**2. What you need to know before taking it**

**2.1 Do not take this medicine when**

- You are allergic to this medicine or any ingredients
- You are pregnancy, planning for pregnancy, or breastfeeding because it causes serious effect to babies
- Patients with active liver disease
- Patients taking posaconazole, an antifungal, because it may cause serious muscle toxicity and acute kidney failure. If you are not sure what medicine you are taking with, please contact your doctor or pharmacist

**2.2 Precautions while taking this medicine**

- **Should not take it with medicines or beverages as follows because they might affect treatment effectiveness or cause harms;** digoxin, herbs, some food supplements
- Medicines that you are taking because taking atorvastatin with some medicines may increase risk of muscle toxicity

- Herbs, food or beverages that you are taking because some products can affect action of atorvastatin

**3. How to use**

**3.1 dosage and how to use**

- You should take it with doctor or pharmacist's advice because dose and duration of treatment of this medicine depends on type and severity of diseases
- You should take it once daily at the same time, before or after meals

**3.2 What you should do if you forget to take it**

- Take it immediately. If you forget the medicine more than 12 hours, take the next dose. Do not take a double dose.

**3.3 What you should do if you take it more than you should**

- Observe your symptoms closely. If you have any severe, abnormal symptoms, go to hospital immediately

**4. What you should do while taking this medicine**

- Take it continuously with doctor or pharmacist's advice
- Visit your doctor regularly to follow effect of treatment and monitor harms of this medicine

**5. Harms of this medicine**

**5.1 Symptoms that you must stop taking the medicine and see your doctor immediately**

- Swelling at face, eyelid, or lip, hives
- Fainting, dizziness, chest tightness, difficult breathing
- Rash, rash with blebs, skin peeling, bruise

or abnormal bleeding

- Muscle toxicity: muscle pain (calves, back), muscle fatigue, muscle cramp, muscle stiffness, dark or brown urine, difficult urination, decreased urine output
- Lost appetite, severe nausea or vomiting, severe stomachache, severe fatigue, yellow skin and eyes, dark-colored or brown urine, pale stools
- Fatigue, paralysis at any side of body
- Difficult breathing, dry cough, weight loss, fatigue and fever

**5.2 Symptoms that stop taking the medicine is not necessary. If you have any severe symptoms, see the doctor immediately.**

- Amnesia, memory impairment, insomnia, having nightmare, confusion

**6. How to store**

- Keep this medicine inside the medicine package
- Take this medicine out of the pack only when you need to take
- Keep this medicine in dry place, not above 30 degrees. Do not expose it to sunlight or keep it in hot and damp place such as in the car, bathroom, kitchen
- Keep this medicine out of reach of children

**Manufacturer/Importer/Distributor/.....**  
**This leaflet is last revised on**  
**March 22<sup>nd</sup> 2016**

**This leaflet is a brief information. If you have any questions, please contact your doctor or pharmacist.**

**Simvastatin**  
**10, 20, 40, milligrams**  
**Oral tablets**

**1. What this medicine is**

**1.1 What generic name of this medicine is**

- Generic name of this medicine is simvastatin, a lipid-lowering medicine

**1.2 what it is used for**

- It is used with diet control for
  - Reducing blood lipid
  - Prevention of cardiovascular and cerebrovascular disease in high-risk patients

**2. What you need to know before taking it**

**2.1 Do not take this medicine when**

- You are allergic to this medicine or any ingredients
  - You are pregnancy, planning for pregnancy, or breastfeeding because it causes serious effect to babies
  - Patients with active liver disease
  - Patients taking medicines as follows because they may cause serious muscle toxicity; oral antifungals (such as itraconazole, ketoconazole), oral antimicrobials (such as erythromycin, clarithromycin), some anti-HIV, some hepatitis C antivirals, immunosuppressive agent named cyclosporin, antidepressant named nefazodone, lipid-lowering medicine named gemfibrozil, and danazol
- If you are not sure what medicine you are taking with, please contact your doctor or pharmacist
- Patients drinking grapefruit juice more than 1 Litre/day

**2.2 Precautions while taking this medicine**

- **Should not take it with medicines or beverages as follows because they might affect treatment effectiveness or cause harms;** warfarin, digoxin, herbs, some food supplements

**3. How to use**

**3.1 dosage and how to use**

- You should take it with doctor or pharmacist's advice because dose and duration of treatment of this medicine depends on type and severity of diseases
- You should take it once daily at the evening or bedtime, before or after meals

**3.2 What you should do if you forget to take it**

- Take it immediately. If you forget the medicine more than 12 hours, take the next dose. Do not take a double dose.

**3.3 What you should do if you take it more than you should**

- Observe your symptoms closely. If you have any severe, abnormal symptoms, go to hospital immediately

**4. What you should do while taking this medicine**

- Take it continuously with doctor or pharmacist's advice
- Visit your doctor regularly to follow effect of treatment and monitor harms of this medicine

**5. Harms of this medicine**

**5.1 Symptoms that you must stop taking the medicine and see your doctor immediately**

- Swelling at face, eyelid, or lip, hives

- Fainting, chest tightness, difficult breathing
- Rash, rash with blebs, skin peeling, bruise or abnormal bleeding
- Muscle toxicity: muscle pain (calves, back), muscle fatigue, muscle cramp, muscle stiffness, dark or brown urine, difficult urination, decreased urine output
- Lost appetite, severe nausea or vomiting, severe stomachache, severe fatigue, yellow skin and eyes, dark-colored or brown urine, pale stools
- Fatigue, paralysis at any side of body
- Difficult breathing, dry cough, weight loss, fatigue and fever

**5.2 Symptoms that stop taking the medicine is not necessary. If you have any severe symptoms, see the doctor immediately.**

- Headache, dizziness, amnesia, constipation, heartburn, bloating, diarrhea

**6. How to store**

- Keep this medicine inside the medicine package
- Take this medicine out of the pack only when you need to take
- Keep this medicine in dry place, not above 30 degrees. Do not keep it in hot and damp place such as in the car, bathroom, kitchen
- Keep this medicine out of reach of children

**Manufacturer/Importer/Distributor/.....**

**This leaflet is last revised on**

**March 22<sup>nd</sup> 2016**

**This leaflet is a brief information. If you have any questions, please contact your doctor or pharmacist.**
